# Supplementary material for: KOSMOS: An Open Source Underwater Video Lander for Monitoring Coastal Fishes and Habitats
Source: MDPI journal article supplement (doi:10.3390/s21227724), 2021-11-20
Supplement: s1 [file s1]

*Table S1. Screenshots from the KOSMOS, STAVIRO-Sony and STAVIRO-Paralenz systems at distances ranging between 1 and 6 m.*

| KOSMOS                                                                                        | STAVIRO                                                                                       | Paralenz                                                                                        |
|-----------------------------------------------------------------------------------------------|-----------------------------------------------------------------------------------------------|-------------------------------------------------------------------------------------------------|
| 1.1 m<br>    | 1.05 m<br>   | 1.07 m<br>   |
| 2.01 m<br>   | 1.99 m<br>   | 2.07 m<br>   |
| 2.98 m<br>  | 3.05 m<br>  | 3.02 m<br>  |
| 3.98 m<br> | 3.99 m<br> | 4.04 m<br> |
| 5.06 m<br> | 4.98 m<br> | 5.04 m<br> |
| 6.07 m<br> | 5.98 m<br> | 6.02 m<br> |

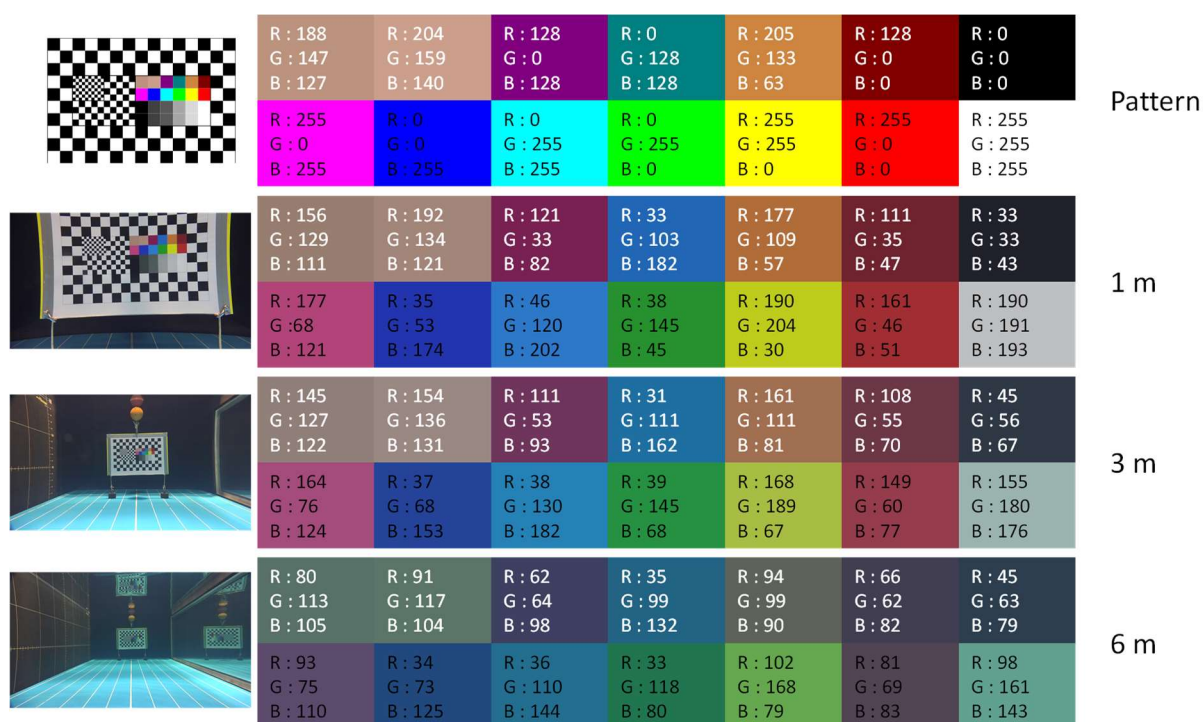

Figure S1. STAVIRO-Sony RGB coefficients at distances of 1, 3 and 6 m. Top: RGB coefficients for test pattern.

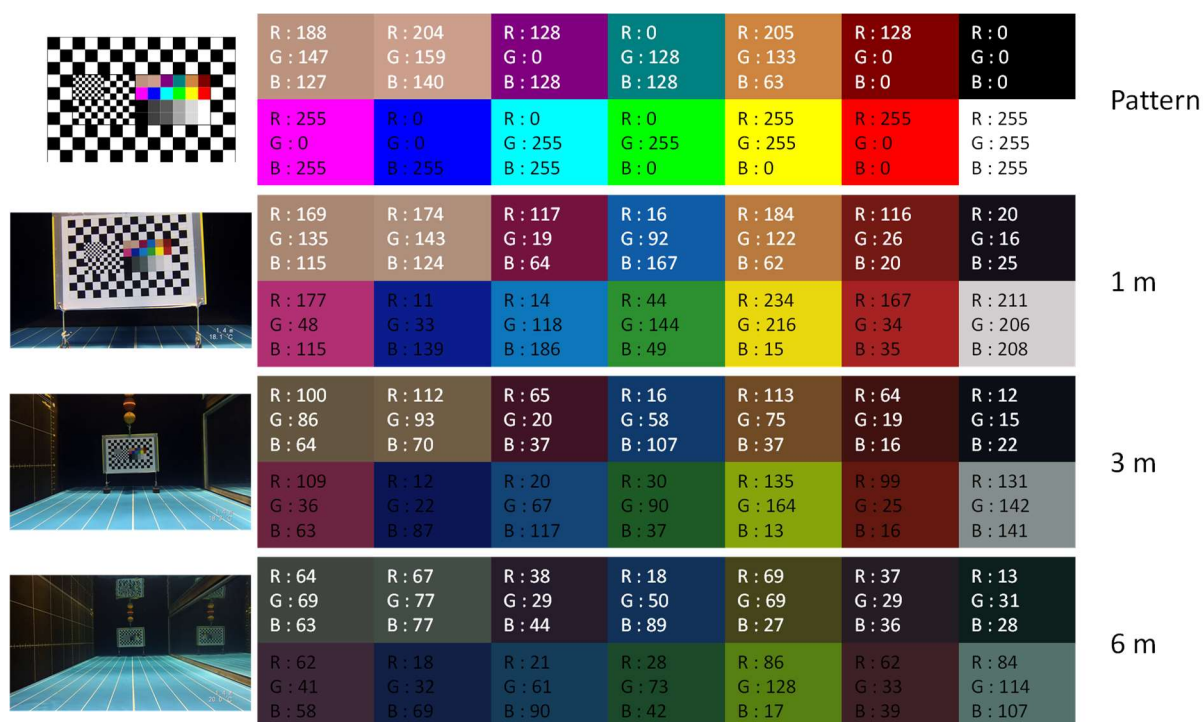

Figure S2. STAVIRO-Paralenz RGB coefficients at distances of 1, 3 and 6 m. Top: RGB coefficients for test pattern.
